# Supplementary material
Source: publisher figshare collection journal article supplement (https://tandf.figshare.com/ndownloader/files/20442576)
Supplement: Supplementary file 1 [file 20442576]

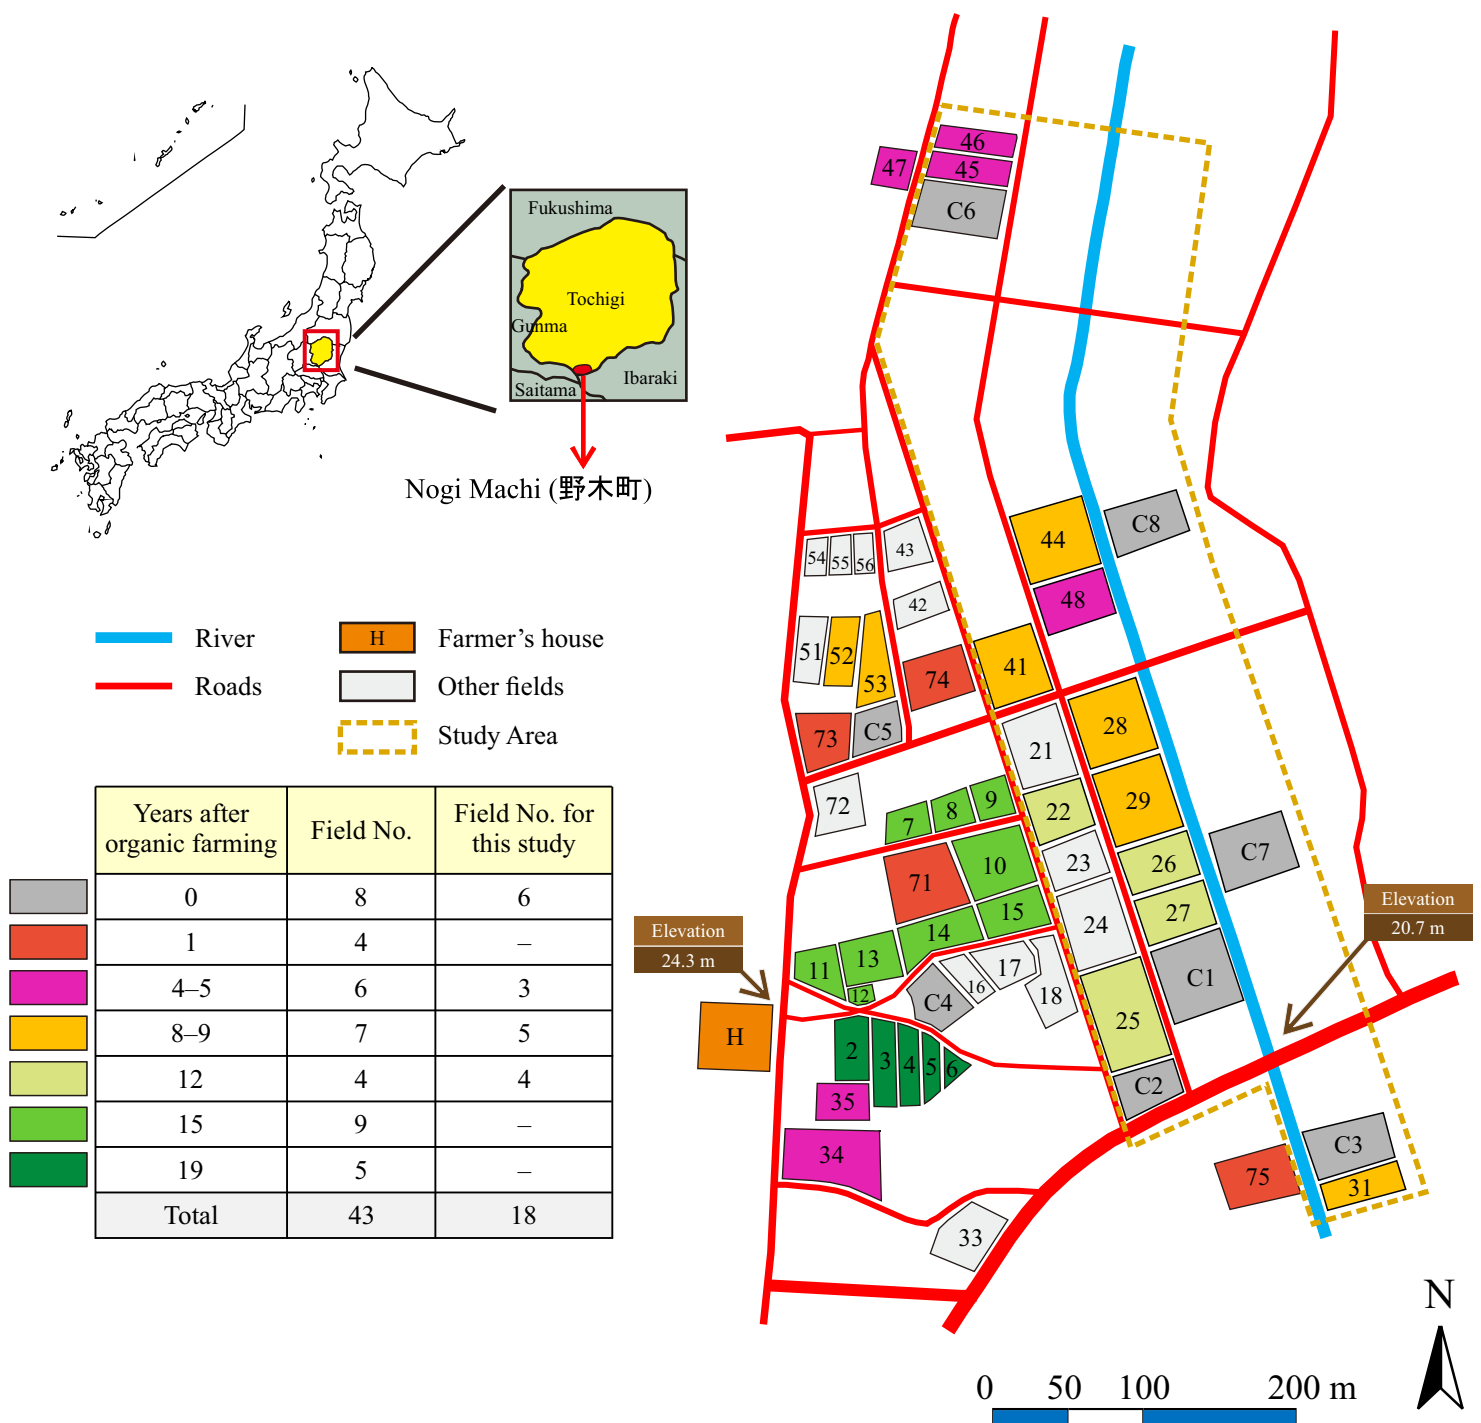

Figure S1. The map showed the site of fields with inserted map of Japan and Tochigi Prefecture to indicate research position. The fields were managed conventionally until organic rice farming was begun in 1992, gradually expanding to the more than 70 fields until 2013 under organic management. In October 2013, total of 43 fields were investigated, but we selected 18 fields located along the riverside with the original soil properties similar to those of the conventional fields for this study.
